# Supplementary material
Source: PubMed Central journal article supplement (PMC8804975)
Supplement: jamainternmed-e218067-s001.pdf [file jamainternmed-e218067-s001.pdf]

1  
2  
3  
4  
5

**IMPACT-C:  
Improving Vaccine Uptake  
in Skilled Nursing Facilities  
Protocol**

6           **IMPACT-C: IMPROVING VACCINE UPTAKE IN**  
7           **SKILLED NURSING FACILITIES**

8                           **Principal Investigators:**

9                           **Vincent Mor, PhD**

10                          Professor of Medicine, Brown University School of Public Health

11                           **Sarah D. Berry, MD MPH**

12                          Associate Professor of Medicine, Marcus Institute for Aging Research, Hebrew SeniorLife

13                           **Supported by:**

14                           NIA 3U54AG063546

15

16

17

18

19

20   **Version 1.5**  
21   **April 7, 2021**

22 |

## 23 **1 PRÉCIS**

### 24 **1.1 Study Title: IMPACT-C: Improving Vaccine Uptake in Skilled Nursing Facilities**

### 25 **1.2 Objective**

26 SARS-CoV-2 vaccine, now being administered to SNF residents and staff, has highly variable  
27 acceptance between facilities. We need to develop and disseminate effective strategies to  
28 increase vaccination immediately. For SNF residents and staff we will develop and implement a  
29 scalable multi-pronged intervention that educates, builds trust and supports the informed consent  
30 process aimed to increase SARS-CoV-2 vaccination. We will compare the rates of vaccination in  
31 staff and residents in facilities that receive electronic messaging and education (i.e., usual care)  
32 versus rates in facilities that receive an additional multi-pronged “high touch” intervention.

33

### 34 **1.3 Design and Outcomes**

#### 35 **Design**

36 We will conduct a cluster randomized trial to compare the effect of electronic messaging and  
37 education (i.e., usual care) versus a multi-pronged “high touch” intervention to reduce vaccine  
38 hesitancy in SNF staff and residents among a random sample of facilities across four SNF  
39 chains. As part of the “high touch” intervention, we will identify and train local opinion leaders.  
40 We will offer these leaders assistance through real-time support for questions and provide  
41 consenting specialists. During the second wave of vaccination, we will provide the intervention  
42 facilities with positive reinforcement for staff and we will identify local champions to garner  
43 support and empowerment of staff. Finally, in the intervention facilities we will provide  
44 additional funds to support COVID-19 testing, in order that facilities have access to enough  
45 testing kits for patient or staff who develops symptoms following vaccination.

46 This trial will be randomized within 4 SNF chains in order to evaluate the effect of a multi-  
47 pronged strategy to improve SARS-CoV-2 vaccine acceptance among direct care staff and long-  
48 stay nursing home residents. In four chains, eligible facilities will undergo randomization  
49 between usual care versus adding the “high touch” intervention, implemented in two waves.  
50 Randomization and roll out of the intervention will occur at the facility level.

#### 51 **Outcomes**

52 The following outcomes related to SARS-CoV-2 vaccination will be measured during the period  
53 of vaccine administration and followup:

#### 54 **PRIMARY OUTCOME:**

55 A binary measure (Yes or No) indicating whether a long stay nursing home resident received any  
56 doses of a SARS-CoV-2 vaccine, identified by the electronic medical records (EMR)

57

#### 58 **SECONDARY OUTCOMES:**

59 Number of direct care staff who received any dose of a SARS-CoV-2 vaccine

60

61

62 **1.4 Interventions and Duration**

63 The entire trial will take place over 11-15 weeks, each intervention facility will be involved in  
64 approximately 1-3 week start up activities, 6-8 weeks of vaccine administration (in all facilities, the  
65 vaccine will be offered on three dates approximately 3-4 weeks a part), and an additional 4 weeks of data  
66 collection. Intervention homes will follow the same timeline for enrollment and data collection. During  
67 the start-up period in the intervention facilities, the research team works with the leadership and opinion  
68 leaders in each SNF to optimize program roll-out within each unique environment.

69 Numerous educational resources regarding vaccination already exist. Through the American Health Care  
70 Association (AHCA), our team plans to disseminate electronic messaging and educational material  
71 regarding the COVID-19 vaccine to 12 SNF chains with some 1,000 facilities including around 100,000  
72 direct care staff and at least 60,000 long-stay residents. This quality improvement initiative represents  
73 typical care practices (i.e., usual care), and it will include all facilities in the four chains that will take part  
74 in the trial. Select facilities within the four chains will additionally receive the “high touch” intervention,  
75 offered in two waves.

76 **1.5 Sample Size and Population**

77 The study sample will include some 150 facilities including around 14,000 direct care staff and  
78 at least 8,500 long-stay residents across 4 SNF chains.

79 **2. STUDY TEAM ROSTER**

80 **2.1 Principal Investigator**

81 **Vincent Mor, PhD**

82 Florence Grant Price Professor School of Public Health, Brown University School of Public Health

83 Email: vincent\_mor@brown.edu

84 Role: Dr. Mor is the PI for the IMPACT-C supplement and will be responsible for all aspects of the trial.  
85 Specifically he will oversee the recruitment of eligible NFs and the budget for Brown University and  
86 subcontract to Insight Therapeutics.

87 **Sarah D. Berry, MD, MPH**

88 Research Scientist, Hinda and Arthur Marcus Institute for Aging Research, Hebrew SeniorLife,

89 Associate Professor of Medicine, Harvard Medical School

90 Address: 1200 Centre Street, Boston, MA 02131

91 Phone: 617-971-5355, Fax: 617-971-5339

92 Email: [SarahBerry@hsl.harvard.edu](mailto:SarahBerry@hsl.harvard.edu)

93

94 Role: Together with Dr. Mor, Dr. Berry will be responsible for all aspects of the trial. Specifically she  
95 will work with Dr. Gravenstein, McConeghy and Goldfeld on the trial design, and with Dr. Johnson, Dr.  
96 Jackson, and Insight Therapeutics on the development and implementation of the intervention. She will be  
97 responsible for budget management of the HSL site, and the management of the Project Director. She will  
98 be responsible for annual project reports to the NIH and IRB approval.

99 **2.2 Co-Investigators:**

100 **Stefan Gravenstein, MD, MPH**

101 David S. Greer Professor of Geriatric Medicine, Director Division of Geriatrics and Palliative Medicine,

102 Brown University

103  401-369-4131; 401-444-5248 (w)

104 Email: Stefan\_Gravenstein@brown.edu

105

106 Role: Dr. Gravenstein is an investigator at Brown University with several decades of clinical vaccine and  
107 antiviral trials experience in nursing home populations. For the proposed project, Dr. Gravenstein will be  
108 instrumental in developing the analytic approach and overseeing the implementation of the intervention.

109

110 **Kevin McConeghy, PharmD, MS**

111 Email: Kevin\_McConeghy@brown.edu

112

113 Role: Dr. McConeghy is an investigator at Brown University with a background in  
114 pharmacoepidemiology and clinical trials, and has worked on large cluster-randomized clinical vaccine  
115 trials with Dr. Gravenstein for 4 years, participating in methods, and leading analytic work. For the  
116 proposed project, Dr. McConeghy will be responsible for overseeing data collection elements from the  
117 facilities, and participate in analytic work related to this trial.

118

119 **Keith Goldfeld, DrPH**

120 Email: Keith.Goldfeld@nyulangone.org

121

122 Role: Dr. Goldfeld is a senior statistician at NYU, and he has more than a decade of experience with  
123 clinical trials in frail, older populations. For the proposed project, Dr. Goldfeld will be responsible for the  
124 developing the analytic approach to the trial, handling missing data, and overseeing the interpretation of  
125 the analyses.  
126

127 **Susan Mitchell, MD MPH:**

128 Senior Scientist, Hinda and Arthur Marcus Institute for Aging Research, Hebrew SeniorLife,  
129 Professor of Medicine, Harvard Medical School  
130 Address: 1200 Centre Street, Boston, MA 02131  
131 Phone: 617-971-5326, Fax: 617-971-5339  
132 Email: [smitchell@hsl.harvard.edu](mailto:smitchell@hsl.harvard.edu)  
133

134 Role: Dr. Mitchell is a senior investigator at the Institute for Aging Research, Hebrew SeniorLife and the  
135 co-Director of the Interventional Studies in Aging Center (ISAC). Dr. Mitchell has considerable  
136 experience in the design and implementation of pragmatic clinical trials in the nursing home setting, and  
137 in particular among persons with Alzheimers Disease and Related Dementias (ADRD). Dr. Mitchell will  
138 provide insight during the implementation phase of the trial.

139 **Jonathan Jackson, MD**

140 Email: [jjackson31@partners.org](mailto:jjackson31@partners.org)

141 Role: Dr. Jackson is a senior investigator at Massachusetts General Hospital with expertise in  
142 understanding racial disparities in healthcare. In the proposed project, Dr. Jackson will serve to inform the  
143 implementation of the intervention, as well as to inform the analytic approach to understand within  
144 facility differences in the effect of the intervention

145 **Edward Davidson, PharmD, MPH**

146 Phone: 757-625-6040  
147 Email: [edavidson@inther.com](mailto:edavidson@inther.com)

148 Role: Dr. Davidson is a Partner of Insight Therapeutics, with expertise in nursing home educational  
149 campaigns and implementing pragmatic clinical trials. He will be responsible for the implementation of  
150 the intervention. This includes identification of the facility champion, production of a series of  
151 educational videos, delivery of frequently asked questions, distribution of items to publicize vaccination,  
152 and facilitating education.  
153

154 Lisa Han, MPH

155 Phone: 757-625-6040

156 Email: [lhsan@inther.com](mailto:lhsan@inther.com)

157 Role: Ms. Han is a partner of Insight Therapeutics, with expertise in nursing home educational campaigns  
158 and implementing pragmatic clinical trials. She will be responsible for overseeing implementation tasks,  
159 including educational material production, project website development, material distribution, and  
160 champion education and support. She will provide strategy and operational oversight and support for the  
161 high touch intervention.

162 **David Gifford, MD, MPH**  
163 Email: [dgifford.ahca.org](mailto:dgifford.ahca.org)

164 Role: Dr. Gifford is the Director, Center for Health Policy Evaluation in LTC at American Health Care  
165 Association. He will provide access and facilitate participation to the SNF chains. He will additionally  
166 provide crucial feedback on the implementation process and requirements for consent that will be  
167 necessary for this proposal.

### 168 **2.3. Consultants**

169 **Kimberly Johnson, MD**  
170 [johns196@mc.duke.edu](mailto:johns196@mc.duke.edu)  
171  (919) 660-7506

172  
173 Role: Dr. Johnson is a Duke geriatrician and palliative care physician, and national expert on health  
174 disparities. In the proposed project, Dr. Johnson will serve as an expert to moderate some of the  
175 informational sessions for staff and as a consultant to advise on the implementation of the intervention.

176  
177 **Chris Rowley, MD**  
178 [Crowley1@bidmc.harvard.edu](mailto:Crowley1@bidmc.harvard.edu)

179  
180 Role: Dr. Rowley will provide expertise and advice on COVID-19 testing, as well as emerging testing  
181 technology.

182  
183 **Michael Mina, MD**  
184 Email: [mmina@hsph.harvard.edu](mailto:mmina@hsph.harvard.edu)

185  
186 Role: Dr. Mina will provide expertise and advice on COVID-19 testing, as well as emerging testing  
187 strategies.

### 188 **2.4. RESEARCH TEAM MEMBERS**

189  
190 **Maggie Syme, PhD**  
191 Project Director, Hinda and Arthur Marcus Institute for Aging Research  
192 Address: 1200 Centre Street, Roslindale MA 02131  
193 Phone: 617-363-8000  
194 Email: [Maggie.l.syme@gmail.com](mailto:Maggie.l.syme@gmail.com)

195  
196  
197 Role: Dr. Syme will work closely with Dr. Berry to oversee all aspects of the trial. This includes  
198 regulatory compliance with the award, organizational meetings, trouble shooting problems with the  
199 facility champions, and facilitating the collection and analysis of data.

200  
201 Amy Recker, MPH

202 Project Director, Brown University School of Public Health

203 Email: amy\_recker@brown.edu

204

205 Role: Ms. Recker will work closely with Dr. Berry and Dr. Mor to help coordinate and oversee all aspects  
206 of the trial. This includes organizational meetings, contact and support to facility champions, and  
207 facilitation the collection and analysis of data.

208

209

210 **Laurie Herndon, NP**

211 Email: [laurieherndon@hsl.harvard.edu](mailto:laurieherndon@hsl.harvard.edu)

212 Role: Ms. Herndon will work with Drs. Berry and Johnson to facilitate the training sessions for the  
213 facility opinion leaders.



214  
215  
216  
217  
218  
219  
220  
221  
222  
223  
224  
225  
226  
227  
228  
229  
230  
231  
232  
233  
234  
235  
236  
237  
238  
239  
240  
241  
242  
243  
244  
245  
246  
247  
248

### 3. STUDY OBJECTIVES

#### 3.1 Primary Objective

**Aim 1:** To conduct a cluster randomized controlled trial (~150 facilities across 4 SNF chains) to compare the number of SNF residents who receive the SARS-CoV-2 vaccine in facilities with usual care versus facilities randomized to the multi-pronged intervention.

H1: We hypothesize that the intervention will increase vaccination of SNF residents by at least 10 percentage points versus facilities usual care alone.

#### 3.2. Secondary Objectives

**Aim 2.** To compare the number of direct care staff who receive any SARS-CoV-2 vaccination in facilities with usual care versus facilities randomized to the multi-pronged intervention.

H2. We hypothesize that staff of NFs with the intervention will have at least a 10 percentage point greater vaccine uptake of vaccine than staff in SNFs that do not participate in the high touch intervention

**Aim 3.** To determine whether the intervention will mitigate resident and staff disparities in SARS-CoV-2 vaccination by race/ethnicity.

H3. We hypothesize that within intervention SNFs, improvements in vaccine uptake will be similar across staff and resident race/ethnicities.

**Aim 4.** To assess the experiences of opinion leaders in intervention facilities in terms of their perceived barriers to intervention implementation, organizational culture, and overall experience with the intervention.

H4: We hypothesize that there will be a high variability in experiences across facility opinion leaders that will inform the results of the trial.

#### 250 **4. BACKGROUND AND RATIONALE**

251 **Epidemiology of COVID-19 in SNFs.** COVID-19 has disproportionately affected nursing  
252 facility (NF) staff and residents in the U.S., with the highest rates of infection and mortality in  
253 both groups.[1, 2] Facility outbreaks vary geographically and over time.[3] Aside from  
254 morbidity, COVID-19 has been extremely costly for NFs due to declining admissions,  
255 purchasing of personal protective equipment (PPE)[4-6] and testing. It is estimated the U.S.  
256 government may pay more than \$15 billion to cover COVID-19 costs in SNFs alone.[7]  
257

258 **Vaccine availability.** Three vaccine candidates are expected to be released in December 2020,  
259 with SNF direct care staff and residents scheduled to be in the first group in the country to be  
260 offered the vaccine. The first two vaccines (Pfizer and Moderna) use a novel microRNA  
261 technology. Phase two trials have already been conducted on over 50,000 and 30,000 persons for  
262 the Pfizer and Moderna vaccines, respectively, with demonstrated safety and efficacy against  
263 COVID-19.[8]  
264

265 **Staff barriers to vaccination.** Despite the promise of these leading vaccine candidates in  
266 decreasing the rates of COVID-19 and serious illness, there are many barriers to having SNF  
267 staff receive the vaccine. First, because the vaccines will all be approved by an Emergency Use  
268 Authorization (EUA), employers will not be able to mandate that staff receive the vaccine.  
269 Second, in a recent survey of 1,250 Black and Latinx Americans, only 18% of Blacks and 31%  
270 of Latinx report that they would definitely get vaccinated if the vaccine were free.[9] This is  
271 consistent with historical differences in rates of influenza vaccination among Black and Latinx  
272 populations relative to non-Hispanic Whites.[10] A primary reason many Blacks/Latinx are  
273 hesitant to accept vaccination is a lack of trust that the vaccine is safe and in the authorities  
274 (including their employers) advocating vaccination.[9] This is alarming in the SNF setting where  
275 the largest group of direct care workers are nursing assistants (NA), and 50% of NA identify as  
276 Black/Latinx.[11, 12] A recent survey conducted by the National Association of Health Care  
277 Assistants (the major professional organization of NAs), confirmed that most NAs do not plan to  
278 be vaccinated for SARS-CoV-2.[13] Finally, staff may express vaccine hesitancy give a fear of  
279 side effects and concern they will be unable to work. Point-of-care COVID-19 testing offers a  
280 practical solution to determine whether staff who exhibit symptoms following vaccination are  
281 able to work; however, low resourced facilities are still having difficulty accessing an adequate  
282 supply of test kits.[14] Therefore, we believe that without a multi-pronged intervention to reduce  
283 vaccine hesitancy and dispel misinformation, vaccination rates among SNF direct care workers  
284 will be low, compromising efforts to protect SNF residents.  
285

286 **Resident barriers to vaccination.** There are also major challenges to insuring that SNF residents  
287 are vaccinated. First, historically Black SNF residents are less likely to receive influenza and  
288 pneumococcal vaccines than are White residents.[5, 6] Most of this difference has been  
289 explained by inequities in offering the vaccine between facilities rather than within facility  
290 differences, although these still remain.[15, 16] SNFs are highly segregated along racial lines,  
291 with resource-poor facilities tending to have larger non-white populations. Second, the first two  
292 vaccines likely to be released require ultra-cold storage meaning SNFs are not equipped to store  
293 these vaccines. CMS has encouraged SNFs to overcome this barrier by partnering with pharmacy

294 chains (e.g. Walgreens) that will deliver the vaccine to staff and residents. Even though verbal  
295 informed consent will be allowed, knowing how many residents and staff will accept the vaccine,  
296 prior to the vaccine supplier being at the NH, will be critical to minimize waste and maintain  
297 maximal efficiency given the finite staffing resources available to ensure all NHs are offered  
298 vaccine in a timely fashion. We anticipate organizing the effort and coordination with the  
299 pharmacy provider will be an enormous barrier for facilities, but in particular, for the resource-  
300 poor facilities with larger Black and Latinx populations who may not have the capacity to  
301 systematically reach out to families to inquire about willingness to be vaccinated, obtain a verbal  
302 or written consent, and manage the documentation needed.

303  
304 **Interventions to reduce disparities in SNFs.** Our team has extensive experience in implementing  
305 interventions to improve healthcare and reduce racial disparities in NFs, including experience  
306 with influenza vaccinations.[17-19] Based on our experience and a review of interventions  
307 targeting influenza vaccination in SNFs[20], we anticipate that a multi-pronged approach will be  
308 necessary to overcome these sizeable barriers and successfully implement the SARS-CoV-2  
309 vaccine among SNF staff and residents. The multi-pronged approach should include the  
310 following components:

311 1. **Electronic Messaging and Education.** Messaging promoting prosocial motivations (i.e.,  
312 protecting one’s community from COVID-19) has been demonstrated to be a stronger  
313 predictor of willingness to practice preventive behaviors for COVID-19 as compared  
314 with messaging promoting personal motivations (i.e., protecting oneself from COVID-  
315 19).[21] This is consistent with systematic reviews of interventions to increase influenza  
316 vaccination in healthcare workers. [22] As part of a quality improvement initiative  
317 through AHCA, we will disseminate videos of staff from different SNFs stating their  
318 reason for choosing to be vaccinated. Messages may be disseminated by 12 SNF chains  
319 by email, text, and on social media. Messages will have links to Frequently Asked  
320 Questions (FAQs) on the web as well as broader Public Service Announcements (PSAs).  
321 This electronic messaging and education will be considered the ‘usual care’ of the cluster  
322 randomized controlled trial described herein. Only four of these 12 chains will  
323 participate in the trial itself.

324 2. **Facility Opinion Leader.** Our own experience in SNFs suggests that providing  
325 educational material by itself is less effective in changing behaviors than when a facility  
326 champion is identified among the direct care staff to reinforce the educational message.[23,  
327 24] In one trial of influenza immunization among SNF staff, researchers noted that staff were  
328 typically siloed by job type,[25] and thus, multiple leaders should ideally be selected for each  
329 job type. We plan to identify up to four individuals within each facility who are trusted  
330 “opinion leaders,” and can receive training so that they may more confidently address  
331 criticism or questions from their peers.

332  
333 3. **Building Trust Locally.** Successful response models to prior epidemics including H1N1  
334 and Ebola have required strong community engagement and a “bottom-up” approach.[26]  
335 We plan to work with the facility opinion leaders to identify a local well- respected member

336 of the community (e.g., minister, teacher, health care provider) who will help promote trust  
337 in the SARS-CoV-2 vaccine.

338 **4. Positive Reinforcement.** Health communication literature suggests that it is equally if not  
339 more important to address positive emotions (e.g., building altruism and hope) as it is  
340 negative emotions (e.g., combatting fear and anxiety) when addressing vaccine  
341 hesitancy.[27] Providing staff goodies (e.g., buttons, T-shirts, masks) as well as promoting  
342 positive images on social media have been successful strategies in increasing influenza  
343 vaccination[20] and improving other health behaviors among SNF staff.

344 **5. Consenting Specialist.** Low-resource SNFs will have very limited time or ability to  
345 counsel proxies on the risks and benefits of receiving the SARS-CoV-2 vaccine. A remote  
346 consenting specialist could overcome this barrier.

347 **6. Testing Supplies.** Phase III trials suggest that as many as 16% of persons will experience  
348 a fever and approximately half experience fatigue and headache, particularly after the second  
349 dose.[8] The CDC has recently provided guidance on the use of point-of-care COVID-19  
350 testing following vaccination that may be helpful to determine if staff are able to work or if  
351 residents need to be isolated.[28, 29] We plan to provide additional funds (\$10,000) for  
352 facilities to use to purchase COVID-19 testing kits, so that these facilities are able to follow  
353 CDC guidelines for residents and staff who have symptoms after vaccination.

354

355 **Summary of significance.**

356 The significance is summarized as follows: 1. COVID-19 has disproportionately affected SNF  
357 workers and residents; 2. Several SARS-CoV-2 vaccines are expected to be available starting  
358 December 2020, and facilities will only have a limited number of opportunities to receive the  
359 vaccine through a consulting pharmacy company; 3. Direct care staff, many of whom are Black  
360 and Latinx, have expressed considerable hesitancy regarding the safety of the vaccine; 4. There  
361 is a history of racial disparities in healthcare across SNFs, including a reduced tendency for  
362 Black residents to receive influenza vaccines; 5. Obtaining clinical consent for vaccination will  
363 be a second, major barrier to successful vaccination of residents along with obtaining a firm list  
364 of staff and residents willing to be vaccinated prior to pharmacy vaccinators coming into the NH  
365 to minimize vaccine waste and ensure efficiency; 6. Low resource facilities often house the  
366 largest numbers of non-white minority residents, and it will be challenging for these facilities to  
367 overcome these sizeable barriers to vaccination without additional support; 7. A multi-pronged  
368 approach that centers on building trust, empowering staff opinion leaders, providing positive  
369 reinforcement, easing the process of obtaining informed consent for the vaccine, aid in  
370 organizing the on-site clinic for staff and residents, and ensuring adequate testing supplies is a  
371 promising strategy to improve acceptance of SARS-CoV-2 vaccination among staff and  
372 residents.

373

374

375 **5. STUDY DESIGN**

376 This will be a cluster randomized trial where the intervention is applied at the facility level. Our  
377 primary interest is the effect of this intervention on SNFs that are characterized by having a  
378 relatively high proportion of residents who are Black or Latinx. The 4 SNF chains that have been  
379 selected have already given assent to participate in this trial. Facilities that are ineligible (e.g.,  
380 institutional instability) have been excluded from the list of facilities for randomization.

381 We will then stratify facilities into three categories based on racial composition of residents:

- 382  
383
- 384 (1) < 25% Black and Latinx residents
  - 385 (2) 25-40% Black and Latinx residents
  - 386 (3) > 40% Black and Latinx residents
- 387

388 Facilities will undergo constrained randomization within each chain and stratum to ensure that  
389 the proportion of Black and Latinx residents is balanced across the intervention arms. We will  
390 randomize a total of 60 SNFs to the intervention, allocated proportionally across the strata. The  
391 SNFs that were removed due to institutional instability will be compared separately to the  
392 control arm to assess potential bias due to selection into the study.

393

394 The Figure below describes the random allocation of facilities:

395

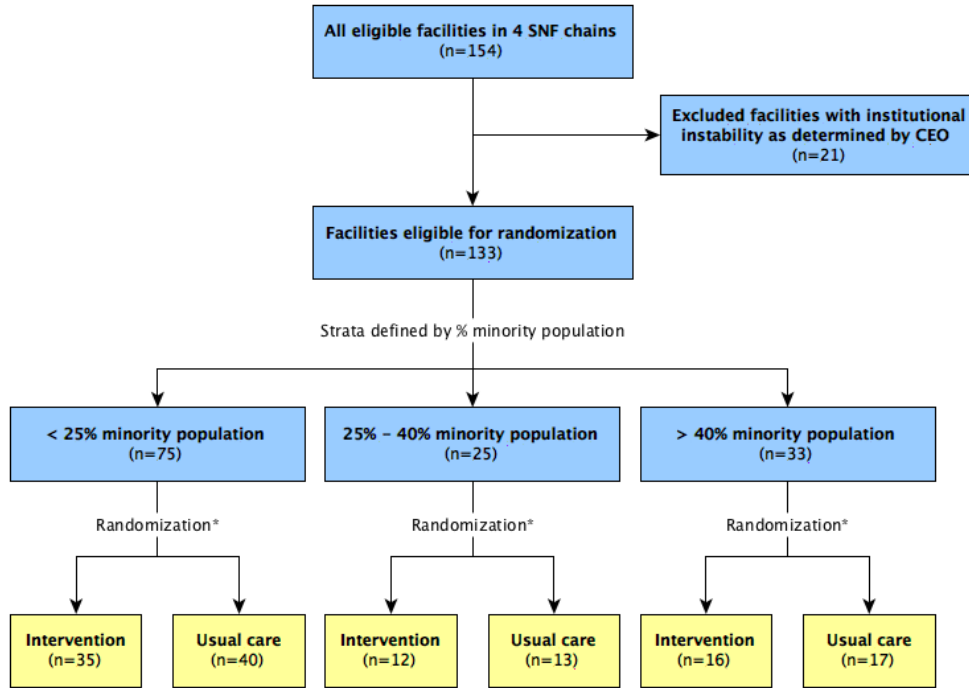

\* randomization is also stratified by SNF chain

396

397

398

399

400

401

402

403

404

405

Staff in facilities randomized to intervention arm will be informed by corporate leadership that they will be participating in a program to maximize COVID 19 vaccination among staff and residents. They will not be informed that this is part of a trial. Individual SNFs will be randomized to the intervention or usual care; randomization will be stratified by chain and by the proportion of minority residents based on three groups: <25%, 25%-40%, >40%. The research implementation team will not be masked to facility assignment. However, the PIs (Mor, Mitchell), the lead statistician (Dr. Goldfeld) and programmers will be masked.

406 **6. SELECTION AND ENROLLMENT OF PARTICIPANTS**

407 The four SNF chains that have been selected to participate in this trial include Vetter, Nexion,  
408 Mission, and Genesis (Northeast facilities only). The intervention will be rolled out facility-wide.  
409 Participation occurs at 3 levels. SNFs will be recruited and enrolled into the study. Site  
410 administrators who agree to participate in the study will serve as gatekeepers within their facility.  
411 Direct care staff will agree to serve as Opinion Leaders. Residents within the facility are eligible  
412 if they qualify as long-stay (defined below).

413 **6.1 Facility inclusion criteria**

414 1) Among Genesis corporation, location in the Northeast (PA, NJ, CT, MA, RI, NH,  
415 VT, ME) AND at least 15% of residents identify as Black or Latinx.

416 **6.2 Facility exclusion criteria**

417 1) Evidence of institutional instability at time of recruitment  
418 2) Other reason (as determined by the SNF CEO) for inability to participate in the high  
419 touch intervention

420 **6.3 Resident inclusion criteria**

421 1) Long-stay will be defined as residence in the same facility for at least 100 days with no  
422 more than 10 days outside the facility on the date the first round of vaccines were delivered

423 **6.4 Resident exclusion criteria**

424 1) Living in the facility for less than 100 days  
425 2) Resident died/transferred during baseline and before the date the first vaccine was  
426 delivered to the facility

427 **6.5 Staff inclusion criteria**

428 1). Staff (i.e., nurses, care aids, dietary, and housekeeping) should provide care in the  
429 facility during the time of any of the vaccine clinics.

430 **6.6 Staff exclusion criteria**

431 1) Not a “usual” provider within the NH (i.e. visiting hospice provider)

432 **6.7 Study Enrollment Procedures**

433 All SNFs in the four chains are prepared to receive electronic messaging and educational  
434 material (i.e., usual care) through the American Health Care Association (AHCA). Within the 4  
435 SNF chains that have agreed to participate in the trial, we will ask the CEOs if there are any  
436 facilities that should be excluded due to leadership instability or other inability to participate in  
437 the multi-pronged intervention. Remaining facilities will be randomized to additionally receive  
438 the multi-pronged intervention versus continuing usual care.

439 **7. STUDY INTERVENTIONS ADMINISTRATION AND DURATION**

440 The entire trial will take place over 11-15 weeks: each facility in the high touch intervention will  
441 be involved in approximately 1-3 week start up activities, 6-8 weeks of vaccine administration  
442 (three scheduled deliveries for vaccine approximately 3-4 weeks a part), and 4 weeks of data  
443 collection. Facilities in the usual care group will follow the same timeline for enrollment and  
444 data collection. During the start-up period in the high touch facilities, the research team works  
445 with the leadership and opinion leaders in each SNF to optimize program roll-out within each  
446 unique environment.

447 **7.1 Usual Care (Electronic Messaging and Education).**

448 All facilities affiliated with the AHCA and IMPACT Collaboratory (12 SNF chains with at least  
449 1,000 facilities) will be offered electronic messaging and education regarding the COVID-19  
450 vaccine. This material stems from the CDC and AMDA resources and represents a suggested  
451 approach to reduce vaccine hesitancy in staff and residents/proxies (e.g., LARs, POAs). This  
452 electronic quality improvement material will be developed as part of a QI initiative and  
453 disseminated by AHCA to the SNF chains and using social media. Within the trial that includes 4  
454 of the 12 SNF chains, this will be considered ‘usual care’ in the control arm. Specific examples  
455 of electronic messaging and education include:

- 456 a. Electronic Messaging – Direct care staff will be encouraged to post a selfie or short video  
457 encouraging others to get vaccinated. These messages will be disseminated through social  
458 media (e.g., Instagram). Messages will be linked with PSAs and FAQs regarding  
459 vaccination that reinforce the safety and efficacy of the vaccine.
- 460 b. PSAs – Our research team, in conjunction with AHCA, will produce a series of short (2-5  
461 minute) video(s) designed to promote trust in the safety and efficacy of the SARS-CoV-2  
462 vaccine, particularly among Black and Latinx direct care workers. The videos will  
463 include direct care staff (NA and or floor nurse) giving a short testimonial about their  
464 experience with vaccination and promoting altruistic feelings about vaccination for the  
465 safety of others. If possible, we will include a short testimonial from a well-respected  
466 member of society specifically encouraging vaccination in SNF staff and residents. SNF  
467 leadership will encourage all staff to watch these videos during the start-up period as part  
468 of regularly scheduled team huddles/meetings or individually. In addition, these links will  
469 be provided to all proxies via letter or email, when they receive the FDA mandated Fact  
470 Sheet regarding the vaccine.
- 471 c. FAQs- The AHCA will additionally disseminate suggested responses for frequently asked  
472 questions that staff and residents/proxies may have about the vaccine. This material has  
473 been reviewed by members of the National Association of Care Health Assistants  
474 (NACHA). SNF leadership will distribute these widely to staff during the start-up period.  
475 We will encourage SNFs to include the FAQ sheet to all proxies by letter or email as part  
476 of the material distributed with the vaccine Fact Sheet.

477 **7.2 HIGH TOUCH MULTI-PRONGED INTERVENTION**

478 Among four SNF chains, we will randomize eligible facilities to receive an additional “high  
479 touch” intervention. These high touch facilities will receive the electronic messaging and  
480 educational material described above. In addition these facilities will work with our research  
481 team on the following:  
482  
483



484 **1. Facility Opinion Leader.** At each intervention facility, our research team will work with  
485 the facility administration to identify local opinion leaders among nursing assistants  
486 (NA), nursing, dietary, and housekeeping. The opinion leaders will participate in the  
487 following activities: 1) Participate in an initial informational meeting with the research  
488 team and other facility opinion leaders; 2) Identify a local champion who could help  
489 participate in educational materials; 3) Participate in the social media messaging  
490 described in the Electronic Messaging section above; 4) Engage the research team for  
491 support and problem solving.

492 We will invite all of the opinion leaders to participate in a one hour virtual informational  
493 meeting with members of our research team and other facility leaders. Meetings will be  
494 organized by discipline (e.g., nursing, dietary) and SNF chain. We will offer a few make-  
495 up sessions for staff who are unable to attend. During these meetings we will cover basic  
496 information on vaccine safety and efficacy, leaving the majority of time for an open  
497 question and answer session. These sessions will NOT be recorded. Opinion leaders who  
498 participate in these meetings will be given a \$50 gift card for their time.

499 Our research team will provide opinion leaders with direct contact information (email and  
500 phone number) of the study team so that they may ask questions during implementation.  
501 Insight Therapeutics will also work to identify a support team that can offer guidance and  
502 problem solve during implementation.

503 **2. Consenting Specialist.** Through Insight Therapeutics, our research team will employ  
504 external staff members to facilitate the clinical consent for vaccination process. Each  
505 facility will make up to ten referrals of residents who were not vaccinated during the first  
506 of the three available vaccine dates to our consenting specialists. Consenting specialists  
507 will contact each proxy, review risks and benefits of the vaccine, and answer questions.  
508 We will provide a 1-800 number for proxies who have additional questions/hesitancy,  
509 and we will offer a group zoom call for interested proxies to review risks and benefits. As  
510 indicated, this consenting process will be a clinical consent for the vaccination itself – not  
511 a study-specific informed consent process to participate in research. We are seeking a  
512 waiver of informed consent for the overall intervention study.

513 **3. Building Trust Locally.** The facility opinion leaders will be encouraged to identify well  
514 respected persons in the community (e.g., minister, teacher, government leader) who are  
515 willing to provide a message promoting trust in the vaccine. Through Insight  
516 Therapeutics, our research team will reach out to these leaders and coordinate the video  
517 messages and implementation plan. Messages will be distributed widely within a facility  
518 by email, website, text and/or social media. Further, our research team will prepare the  
519 community leaders to serve as an additional support for the facility opinion leaders  
520 during implementation.

521 **4. Positive Reinforcement.** Our research team will create and distribute buttons, T-shirts,  
522 and masks that promote awareness about vaccination (e.g., Ask me about the COVID-19  
523 vaccine! OR Vaccinated for You!). These items will be distributed through facility  
524 leadership at each facility, with recommendations to give each staff member these  
525 goodies when vaccinated.  
526  
527

528 **5. Testing Supplies.** Our research team will provide funds (\$10,000) to each facility in the  
529 high touch intervention arm, that the facility may use to acquire additional COVID-19  
530 testing kits. This will enable frequent testing of any residents and staff that experience  
531 symptoms following vaccination. Given that the cost of most point-of-care testing kits is  
532 around \$50, these funds will support the cost of approximately 200 test kits. We will  
533 suggest that facilities follow the CDC recommendations for testing following  
534 vaccination.[28, 29] Our research team will additionally facilitate kits for facilities that  
535 are experiencing difficulty securing the test kits.

536 .  
537 The high touch intervention will be implemented in two waves. For the first cycle of vaccine  
538 administration we will focus on identifying opinion leaders and positive reinforcement. During  
539 the second round we will add building trust locally, a consenting specialist, and testing supplies.

540

541 **8. DATA COLLECTION ELEMENTS AND PROTOCOL**

542 **8.1 Facility Data**

543 Nursing home data are collected prior to the start of the study for descriptive purposes and to  
544 inform the development of a list of eligible facilities for recruitment. These include elements  
545 from Nursing Home Compare, including: the number of beds, hospital-based, special care  
546 dementia unit, nursing and nursing assistant hours/resident/day, and number of deficiencies on  
547 state inspections.

548

549 **8.2 Resident Data**

550 Resident data is already being collected for all facilities within the 4 chains as part of the RADx-  
551 UP supplement. Existing data transfer agreements from all 4 chains have been signed and  
552 authorized. We plan to use data from the electronic medical record, as well as data from the  
553 Minimum Data Set (MDS) for this study. Resident characteristics will be obtained during  
554 baseline only (that is during the 3 months before the vaccine is first delivered to the facility)  
555 whereas vaccination data will be obtained during the 6-8 weeks of implementation and 4 weeks  
556 of followup..

557 Demographic: age, gender, race, ethnicity, proxy contact information (for “high touch” facilities  
558 only in need of consenting specialist) and relationship to resident.

559

560 Medical co-morbidity: All active medical diagnoses. History of COVID-19 infection from  
561 testing results and diagnoses in EMR.

562 Functional status: Katz Activities of Daily Living Scale from MDS; Dementia severity  
563 (Cognitive Functional Scale)

564

565 Influenza Vaccination: Using EMR and MDS data we will also determine if each resident  
566 received the influenza vaccine during the 2020-2021 season

567 SARS-CoV-2 Vaccination: Using the EMR we will determine if each resident received any dose  
568 of the SARS-CoV-2 vaccine within the vaccine implementation period and 4 weeks from the last  
569 date the vaccine was delivered to the facility.

570

571 **8.3. Staff data**

572 Each facility will provide our team with a log of aggregated staff vaccination (counts of number  
573 of staff vaccinated). We will calculate the number of eligible staff in a facility using the Kronos  
574 time and effort reports along with Payroll-Based Journal data.

575 For Genesis facility only, we will receive additional person level information on staff  
576 demographics (job description, race/ethnicity) from Human Resources.

577 In addition, the facility opinion leaders will be surveyed with regards to their experience of the  
578 intervention components. This anonymous data will be collected via a Qualtrics survey sent  
579 directly to all opinion leaders.

580

581 **9. STATISTICAL ANALYSIS**

582

583 9.1 **General Design:** The hypothesis that will be tested is whether facilities that receive the high  
584 touch multi-pronged intervention will achieve a greater number of staff and residents  
585 vaccinated as compared with facilities randomized to usual care.

586

587 **9.2 Sample Size and Randomization:**

588

589 **9.3 Outcomes**

590

591 Primary Outcome – The primary outcome will be a binary measure (Yes or No) indicating  
592 whether an eligible resident received any doses of the vaccine during the study period.

593

594 Secondary Outcome – The secondary outcome will be the number of staff that received any dose  
595 of the vaccine during the study period. This will be the count of all eligible staff who received  
596 one or more doses of the vaccine.

597

598 We will examine the primary outcome separately by race/ethnicity (defined as White, Black,  
599 Latinx, and Other). In one SNF chain (Genesis) we will examine the secondary outcome  
600 separately by race/ethnicity.

601

602 **9.4 Approach**

603 The treatment effect based on the primary binary outcome will be the estimated odds ratio (OR).  
604 The primary outcome will be analyzed at the individual resident level using a mixed effects  
605 generalized linear model with a binomial distribution that includes both network fixed effects,  
606 race/ethnicity strata-specific fixed effects as well as nursing home-specific random effects:

607

$$\log \left( \frac{P(Y_{ijk} = 1)}{1 - P(Y_{ijk} = 1)} \right) = \beta_0 + \beta_1 T_{jk} + \beta_2 (S_{jk} = 2) + \beta_3 (S_{jk} = 3) + \alpha_k + b_{jk},$$

608

609 where  $Y_{ijk}$  is an indicator variable for resident  $i$  in nursing home  $j$ /network  $k$ , where  $k \in$   
610  $(1, 2, 3, 4)$ ;  $Y_{ijk} = 1$  if the resident received the vaccine and  $Y_{ijk} = 0$  otherwise.  $T_{jk}$  is an  
611 indicator variable for nursing home  $j$ /network  $k$ ;  $T_{jk} = 1$  if the nursing home is in the  
612 intervention arm and  $T_{jk} = 0$  if in the control arm.  $S_{jk}$  is the strata indicator,  $S_{jk} \in (1, 2, 3)$ .  $\alpha_k$   
613 is the network-specific fixed effect for network  $k$ .  $b_j$  is the nursing home-specific random effect,  
614 which has a normal distribution with mean 0 and standard deviation  $\sigma_b$ . The parameter  $\beta_1$  is the  
615 log-OR of vaccination, comparing the odds of vaccination for those in the intervention arm with  
616 the odds of vaccination for those in the control arm.

617

618 We will estimate an odds ratio ( $\hat{\beta}_1$ ) along with a 95% confidence interval. We will conduct a  
619 two-sided hypothesis test based on  $H_0: \beta_1 = 0$  vs.  $H_1: \beta_1 \neq 0$  using an  $\alpha$ -level 0.05. All analyses  
620 will be conducted using the latest version of R (currently 4.0.3, R Foundation for Statistical  
621 Computing, Vienna, Austria).

622

623 We will use an intention-to-treat approach as our primary analytic approach, including all  
624 facilities that were randomized to the intervention regardless of implementation of the  
625 intervention components. Additional exploratory analyses will estimate a complier average  
626 causal effect to assess the effect of the intervention on those SNFs who fully engage in the  
627 intervention.

628 Because the components of the “high touch” intervention will be rolled out sequentially in waves  
629 (e.g., first facility champion and positive reinforcement, then building local trust, consenting  
630 specialist and additional testing supplies) we will examine the individual and additive effects of  
631 program components, if possible.

632  
633 A similar approach will be used to determine the effect of the high touch intervention on staff  
634 vaccination.

635  
636 The logistic model described for the primary analysis will be extended to include race and  
637 ethnicity indicators as well as interaction terms, to better understand if the treatment effect is  
638 heterogeneous across different subgroups of residents.

## 639 9.5 POWER ESTIMATE

641 Using the `crtpwr.2prop` function in the R package `clusterPower` (version 0.6.111), we estimate  
642 that with **60** facilities in the intervention group, we will have 90% power to observe a difference  
643 of 10 percentage points and 80% power to observe a difference of 8 percentage points, under the  
644 assumption that the probability of vaccination is 70% in the intervention facilities, an intraclass  
645 correlation of 0.05, and average cluster size of 60. This is likely a conservative estimate of the  
646 intraclass correlation, and we will have 80% power to observe a difference of just 6 percentage  
647 points if the intraclass correlation is 0.02 and other assumptions remain unchanged (see Figure).

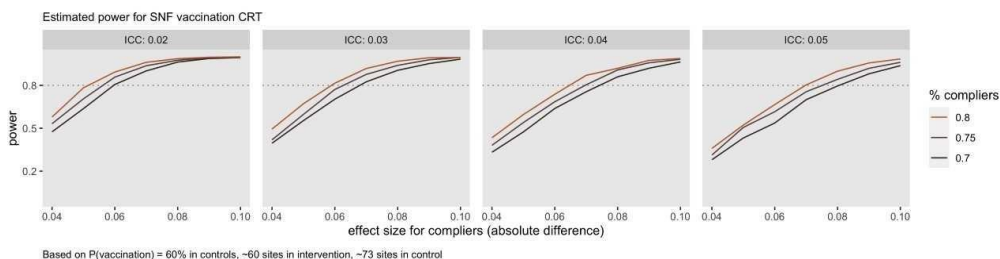

648

649

## 650 **10. HUMAN SUBJECT PROTECTIONS**

### 651 **10.1 Sources of Data**

652 Resident EMR: The residents' EMR medical is already being transferred at regular intervals to  
653 secure servers at Brown University as part of this RADx-UP supplement. This will include  
654 information the information regarding vaccination and history of COVID-19 infection.

655 Minimum Data Set: We already have DUAs in place to allow use of MDS data for all 12 SNF  
656 chains. This will be used to provide descriptive information about residents in the trial.

657 Facility logs: Facilities will provide staff COVID-19 vaccination logs (binary counts of the  
658 number of staff vaccinated).

659 Kronos and time and effort reporting: We already have data transfer agreements in place for  
660 Kronos, and we will be using this data to identify the number of eligible staff in each facility.

661 Payroll-Based Journal data: This publicly available dataset via the Centers for Medicare and  
662 Medicaid Services will provide staffing estimates from total hours worked per day for all study  
663 facilities.

664 Genesis Human Resources Data: We already have data transfer agreements in place to share  
665 demographic information on staff within the Genesis facility, including age, length of time of  
666 employment, and race/ethnicity.

667 Proxy name and contact: In the intervention homes only, our study team and credentialing  
668 specialists (through Insight Therapeutics) will receive referrals with the name, contact number  
669 and relationship of proxies who have not responded to the electronic informed consent request in  
670 the first round of vaccination. This information will be stored securely either in locked cabinets  
671 or behind a secure server and will NOT be distributed or used in any of the analysis.

672 Opinion leader survey data: We will collect anonymous data from opinion leaders via a Qualtrics  
673 survey that will be examined at an aggregate level. The information will be stored securely via a  
674 secured server.

## 675 **11. POTENTIAL RISKS OF STUDY PROCEDURES**

676 The study meets criteria for minimal risk. Our intervention to reduce vaccine hesitancy is based  
677 on suggestions from experts and recommendations from leading organizations, the risk of harm  
678 is low.

679 We will request both a waiver of informed consent under the Common Rule and a HIPAA  
680 waiver of authorization under the HIPAA Privacy Act for resident and staff participation in this  
681 study.

### 682 **11.1 Potential Medical Risk to Study Participants**

683 Data from the Pfizer vaccine Phase III studies suggests that the risk of adverse events from  
684 vaccination is low, even in residents over the age of 65.[8] The most common side effects are  
685 arm pain, followed by fatigue, headache, chills and fever. Although side effects of the vaccine

686 itself are not directly related to our intervention, we do plan to collect and report information on  
687 adverse events among residents in all facilities (see description below).

688 We do not anticipate any potential psycho-social risks discomforts or inconveniences of study  
689 procedures beyond those encountered in usual care practices. The intervention provides  
690 information for proxies and staff about the safety and efficacy of the vaccine. The intervention  
691 will be rolled out at a facility level. Staff and proxies do not have to view any of the electronic  
692 material or participate in any training sessions that we will provide.  
693

694 The risk of loss of confidentiality is low. Our team is already collecting this data as part of  
695 existing data transfer agreements with provisions to keep identifiable data safe. Staff who  
696 participate in the Opinion Leader training sessions will need to provide their name and facility, in  
697 order to receive reimbursement with an e-gift card. This list of names will be kept behind a  
698 secure server and will NOT be distributed or used in any of the analysis. The consenting  
699 specialists will receive referrals with confidential information including patient and proxy name.  
700 This information will be kept behind a secure server and will NOT be distributed or used in any  
701 of the analyses.

702

703 One additional potential burden of this study is the time commitment of the SNF staff in to  
704 address questions raised by the electronic material we will provide. We will provide staff with a  
705 list of FAQs that may be helpful. In addition, for the intervention facilities we will offer some  
706 training and support for facility opinion leaders.

707

### 708 **11.3 Adverse Events and Serious Adverse Events**

709 This is a study to reduce vaccine hesitancy and we do not anticipate any study related adverse  
710 events to occur in this study. Separately, members of our team are monitoring adverse side  
711 effects of the vaccine in residents within one SNF chain (Genesis).

712

#### 713 **AE/SAE Definitions:**

714 The study will adhere to the definitions for AEs and SAEs stipulated in the [NIA Adverse Event](#)  
715 [and Serious Adverse Event Guidelines](#) as outlined below.

716

717 **AE Definition:** AE is any untoward or unfavorable medical occurrence in a human study  
718 participant, including any abnormal sign (e.g. abnormal physical exam or laboratory finding),  
719 symptom, or disease, temporally associated with the participants' involvement in the research,  
720 whether or not considered related to participation in the research.

721

722

723

---

724 **SAE Definition:** SAEs consist of any adverse event that results in death; requires  
725 hospitalization; or anaphylaxis/ meets the Centers for Disease Control definition of serious  
726 adverse events potentially associated with the vaccine ([CDC weblink](#))

#### 727 **Reporting Procedures**



728 The study team will collect information on SAEs (deaths, hospitalizations, and CDC defined  
729 potential serious related adverse events) among residents using the Electronic Medical Records  
730 (EMR). This information is sent securely to Brown University from some facility daily, for other  
731 data is transmitted weekly or monthly.

732 We propose the following reporting schedule for AEs and SAEs:

- 733 • All **adverse events that are both serious (SAE) and unexpected** (i.e., have not been  
734 previously reported for the study's intervention) should be reported to the IRB, NIA PO and  
735 to the NIA-Appointed Safety Officer (SO) within 48 hours of the study's knowledge of  
736 SAE.
- 737 • The summary of all other SAEs should be reported to NIA PO and to the SO along with  
738 recruitment and retention milestones, quarterly (unless otherwise requested by the SO). The  
739 SO will make recommendations to the DSMB and the NIA  
740 PO particularly regarding the *related* SAEs and recruitment and retention milestones.  
741 Expected SAEs unrelated to the trial intervention are listed in DSMP and include death,  
742 hospitalization, and vaccine-related adverse reactions as per CDC (i.e., anaphylaxis). There  
743 are no expected SAEs related to the trial intervention which aims to reduce vaccine  
744 hesitancy.
- 745 • The DSMB provides overall data and safety monitoring oversight for the study and makes  
746 recommendation to the NIA regarding study continuation.
- 747 • All deaths will be reported to the Safety Officer, IMPACT-C Collaboratory Regulatory and  
748 Data Team Leader (Julie Lima PhD), Advarra IRB, NIA IMPACT Collaboratory PO (Dr.  
749 Partha Bhattacharya) within 24 hours of study's knowledge of death.
- 750 • AEs will be reported per IRB policies and also to IMPACT Collaboratory Regulatory and  
751 Data Team Leader (Julie Lima PhD), Advarra IRB, NIA IMPACT Collaboratory PO (Dr.  
752 Partha Bhattacharya), and the IMPACT Collaboratory DSMB Chair (or the project's Safety  
753 Officer at minimum every 6 months, or at a frequency requested by NIA and/or by the  
754 DSMB.  
755

## 756 **11.2 Safety Monitoring**

757 As agreed upon by the NIA and overseeing project officer, Dr. Partha Bhattacharyya, safety  
758 monitoring will be the responsibility of a Data Safety Monitor (DSM). Additionally, the project  
759 officer will appoint a Safety Officer. Given the urgent need to begin this study immediately, we  
760 will review any issues raised by the data safety monitoring officer simultaneously with IRB  
761 review. Similarly, given the very short timeline for vaccine administration in SNFs, we will not  
762 plan an interim DSM meeting, but we will provide the project officer and SO the SAE reports  
763 quarterly, or sooner if available, and they will notify DSMB of related SAEs. The DSM may  
764 determine the need to stop the continuation of the study based on examination of these reports.

## 765 **12. INTERVENTION DISCONTINUATION**

766 The study may be discontinued at any time by the IRB, the NIA, OHRP or other government  
767 agencies as part of their duties to ensure that research participants are protected. Individual SNFs  
768 in the intervention arm may withdraw from study participation at any time at the discretion of  
769 their senior management or corporate supervisors. Staff and proxies or residents can opt out of

770 viewing any of the electronic material we will provide. Facilities may choose to implement only  
771 some of the intervention. Variation in implementation is expected in clinical practice and as part  
772 of this pragmatic trial.  
773

774 **13. REFERENCES**

- 775 1. Abbasi, J., "Abandoned" Nursing Homes Continue to Face Critical Supply and Staff  
776 Shortages as COVID-19 Toll Has Mounted. JAMA, 2020.
- 777 2. McGarry BE, P.L., Grabowski DC., *Nursing Home Workers Now Have the Most*  
778 *Dangerous Jobs in America. They Deserve Better.* in *Washington Post*. 2020.
- 779 3. Services, C.f.M.M. *COVID-19 Nursing Home Data*. 2020 [cited 2020 June 30];  
780 Available from: [https://data.cms.gov/stories/s/COVID-19-Nursing-Home-Data/bkwz-](https://data.cms.gov/stories/s/COVID-19-Nursing-Home-Data/bkwz-xpvg)  
781 [xpvg](https://data.cms.gov/stories/s/COVID-19-Nursing-Home-Data/bkwz-xpvg).
- 782 4. Amir, O., et al., *Incidence of hip fracture in Native American residents of U.S. nursing*  
783 *homes*. Bone, 2019. **123**: p. 204-210.
- 784 5. Cai, S., et al., *Despite small improvement, black nursing home residents remain less*  
785 *likely than whites to receive flu vaccine*. Health Aff (Millwood), 2011. **30**(10): p. 1939-  
786 46.
- 787 6. Hausmann, L.R., et al., *Racial and ethnic disparities in pneumonia treatment and*  
788 *mortality*. Med Care, 2009. **47**(9): p. 1009-17.
- 789 7. Werner, R.M., A.K. Hoffman, and N.B. Coe, *Long-Term Care Policy after Covid-19 -*  
790 *Solving the Nursing Home Crisis*. N Engl J Med, 2020.
- 791 8. Polack, F.P., et al., *Safety and Efficacy of the BNT162b2 mRNA Covid-19 Vaccine*. N  
792 Engl J Med, 2020.
- 793 9. *COVID Collaborative Survey: Coronavirus Vaccination Hesitancy in the Black and*  
794 *Latinx Communities* L.R. Associates, Editor. 2020.
- 795 10. Daugherty, J.D., et al., *Influenza vaccination rates and beliefs about vaccination among*  
796 *nursing home employees*. Am J Infect Control, 2015. **43**(2): p. 100-6.
- 797 11. Foundation, K.F. *COVID019 and Workers at Risk: examining the Long-Term Care*  
798 *workforce*. 2020 [cited 2020 July 10]; Available from:  
799 [https://www.ahcancal.org/News/news\\_releases/Documents/AHCA-NCAL-Survey-](https://www.ahcancal.org/News/news_releases/Documents/AHCA-NCAL-Survey-Testing-Results.pdf)  
800 [Testing-Results.pdf](https://www.ahcancal.org/News/news_releases/Documents/AHCA-NCAL-Survey-Testing-Results.pdf).
- 801 12. PHI. *Quality Care through Quality Jobs*. 2020 [cited 2020 July 10]; Available from:  
802 [https://www.ahcancal.org/News/news\\_releases/Documents/AHCA-NCAL-Survey-](https://www.ahcancal.org/News/news_releases/Documents/AHCA-NCAL-Survey-Testing-Results.pdf)  
803 [Testing-Results.pdf](https://www.ahcancal.org/News/news_releases/Documents/AHCA-NCAL-Survey-Testing-Results.pdf).
- 804 13. Porter, L., *National Association of Health Care Assistants (NACHA)*. 2020.
- 805 14. McGarry, B.E., et al., *COVID-19 Test Result Turnaround Time for Residents and Staff in*  
806 *US Nursing Homes*. JAMA Intern Med, 2020.
- 807 15. Bardenheier, B., et al., *Racial inequities in receipt of influenza vaccination among long-*  
808 *term care residents within and between facilities in Michigan*. Med Care, 2011. **49**(4): p.  
809 371-7.
- 810 16. Bardenheier, B.H., et al., *Persistence of Racial Inequities in Receipt of Influenza*  
811 *Vaccination among Nursing Home Residents in the United States*. Clin Infect Dis, 2020.
- 812 17. Gravenstein, S., et al., *Feasibility of a cluster-randomized influenza vaccination trial in*  
813 *U.S. nursing homes: Lessons learned*. Hum Vaccin Immunother, 2018. **14**(3): p. 736-743.
- 814 18. Gravenstein, S., et al., *Comparative effectiveness of high-dose versus standard-dose*  
815 *influenza vaccination on numbers of US nursing home residents admitted to hospital: a*  
816 *cluster-randomised trial*. Lancet Respir Med, 2017. **5**(9): p. 738-746.
- 817 19. Mitchell, S.L., et al., *An Advance Care Planning Video Decision Support Tool for*  
818 *Nursing Home Residents With Advanced Dementia: A Cluster Randomized Clinical Trial*.  
819 JAMA Intern Med, 2018. **178**(7): p. 961-969.

- 820 20. Rashid, H., et al., *Assessing Interventions To Improve Influenza Vaccine Uptake Among*  
821 *Health Care Workers*. Health Aff (Millwood), 2016. **35**(2): p. 284-92.
- 822 21. Heffner, J., M.L. Vives, and O. FeldmanHall, *Emotional responses to prosocial messages*  
823 *increase willingness to self-isolate during the COVID-19 pandemic*. Pers Individ Dif,  
824 2021. **170**: p. 110420.
- 825 22. Lytras, T., et al., *Interventions to increase seasonal influenza vaccine coverage in*  
826 *healthcare workers: A systematic review and meta-regression analysis*. Hum Vaccin  
827 Immunother, 2016. **12**(3): p. 671-81.
- 828 23. Loomer, L., et al., *Nursing Home Characteristics Associated With Implementation of an*  
829 *Advance Care Planning Video Intervention*. J Am Med Dir Assoc, 2019. **20**(7): p. 804-  
830 809 e1.
- 831 24. Palmer, J.A., et al., *Barriers and facilitators to implementing a pragmatic trial to*  
832 *improve advance care planning in the nursing home setting*. BMC Health Serv Res,  
833 2019. **19**(1): p. 527.
- 834 25. Chambers, L.W., et al., *A new approach to improving healthcare personnel influenza*  
835 *immunization programs: a randomized controlled trial*. PLoS One, 2015. **10**(3): p.  
836 e0118368.
- 837 26. Gilmore, B., et al., *Community engagement for COVID-19 prevention and control: a*  
838 *rapid evidence synthesis*. BMJ Glob Health, 2020. **5**(10).
- 839 27. Chou, W.S. and A. Budenz, *Considering Emotion in COVID-19 Vaccine*  
840 *Communication: Addressing Vaccine Hesitancy and Fostering Vaccine Confidence*.  
841 Health Commun, 2020. **35**(14): p. 1718-1722.
- 842 28. CDC. *Post Vaccine Considerations for Healthcare Personnel*. 2020 [cited 2020  
843 December 15]; Available from: [https://www.cdc.gov/coronavirus/2019-ncov/hcp/post-](https://www.cdc.gov/coronavirus/2019-ncov/hcp/post-vaccine-considerations-healthcare-personnel.html)  
844 [vaccine-considerations-healthcare-personnel.html](https://www.cdc.gov/coronavirus/2019-ncov/hcp/post-vaccine-considerations-healthcare-personnel.html).
- 845 29. CDC. *Post Vaccine Considerations for Nursing Home Residents*. 2020 [cited 2020  
846 December 15]; Available from:  
847 <https://www.cdc.gov/coronavirus/2019-ncov/hcp/post-vaccine-considerations-residents.html>.

848
