# Supplementary material
Source: PubMed Central journal article supplement (PMC8804975)
Supplement: jamainternmed-e218067-s002.pdf [file jamainternmed-e218067-s002.pdf]

## Supplemental Online Content

Berry SD, Goldfeld KS, McConeghy K, et al. Evaluating the findings of the IMPACT-C randomized clinical trial to improve COVID-19 vaccine coverage in skilled nursing facilities. *JAMA Intern Med*. Published online January 31, 2022.  
doi:10.1001/jamainternmed.2021.8067

**eFigure 1.** Variation in IMPACT-C intervention implementation across healthcare systems

**eFigure 2.** Proportion of SNF residents vaccinated by arm, stratified by percent minority resident status

**eFigure 3.** Proportion of SNF staff vaccinated by arm, stratified by percent minority resident status

**eFigure 4.** IMPACT-C study timeline

This supplemental material has been provided by the authors to give readers additional information about their work.

eFigure 1: Variation in IMPACT-C intervention implementation across healthcare systems

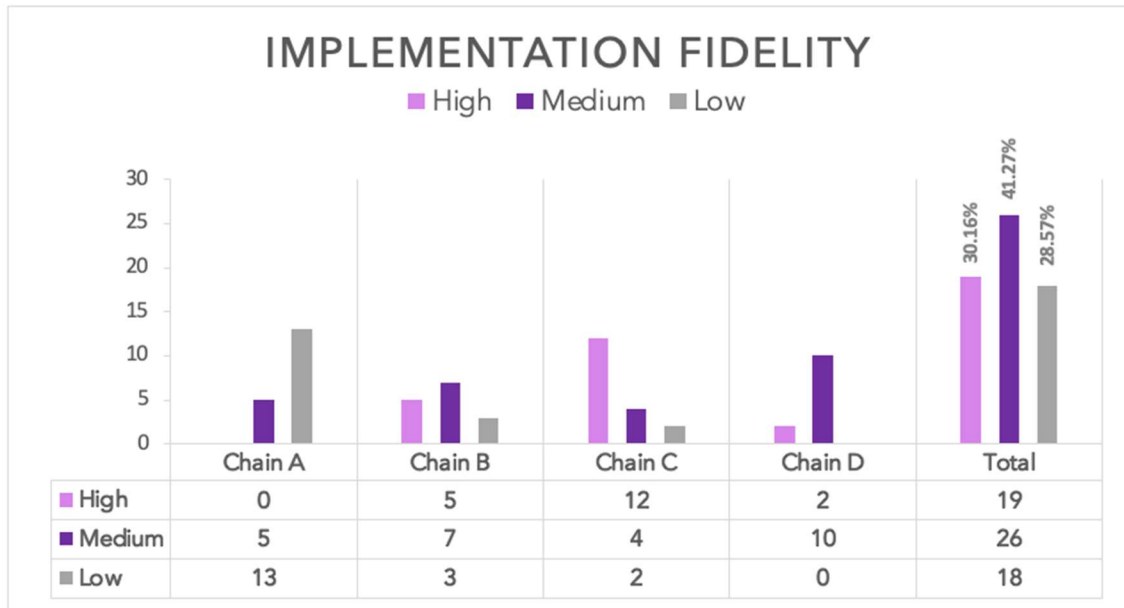

Note: Modified Fidelity Implementation Framework (FIF) scoring system; scores range from 0 to 16, total range of scores was divided into three tertiles: High, Medium, and Low implementation. Cells are counts of facilities in each category by healthcare system (i.e., chain).

eFigure 2: Proportion of SNF residents vaccinated by arm, stratified by percent minority resident status

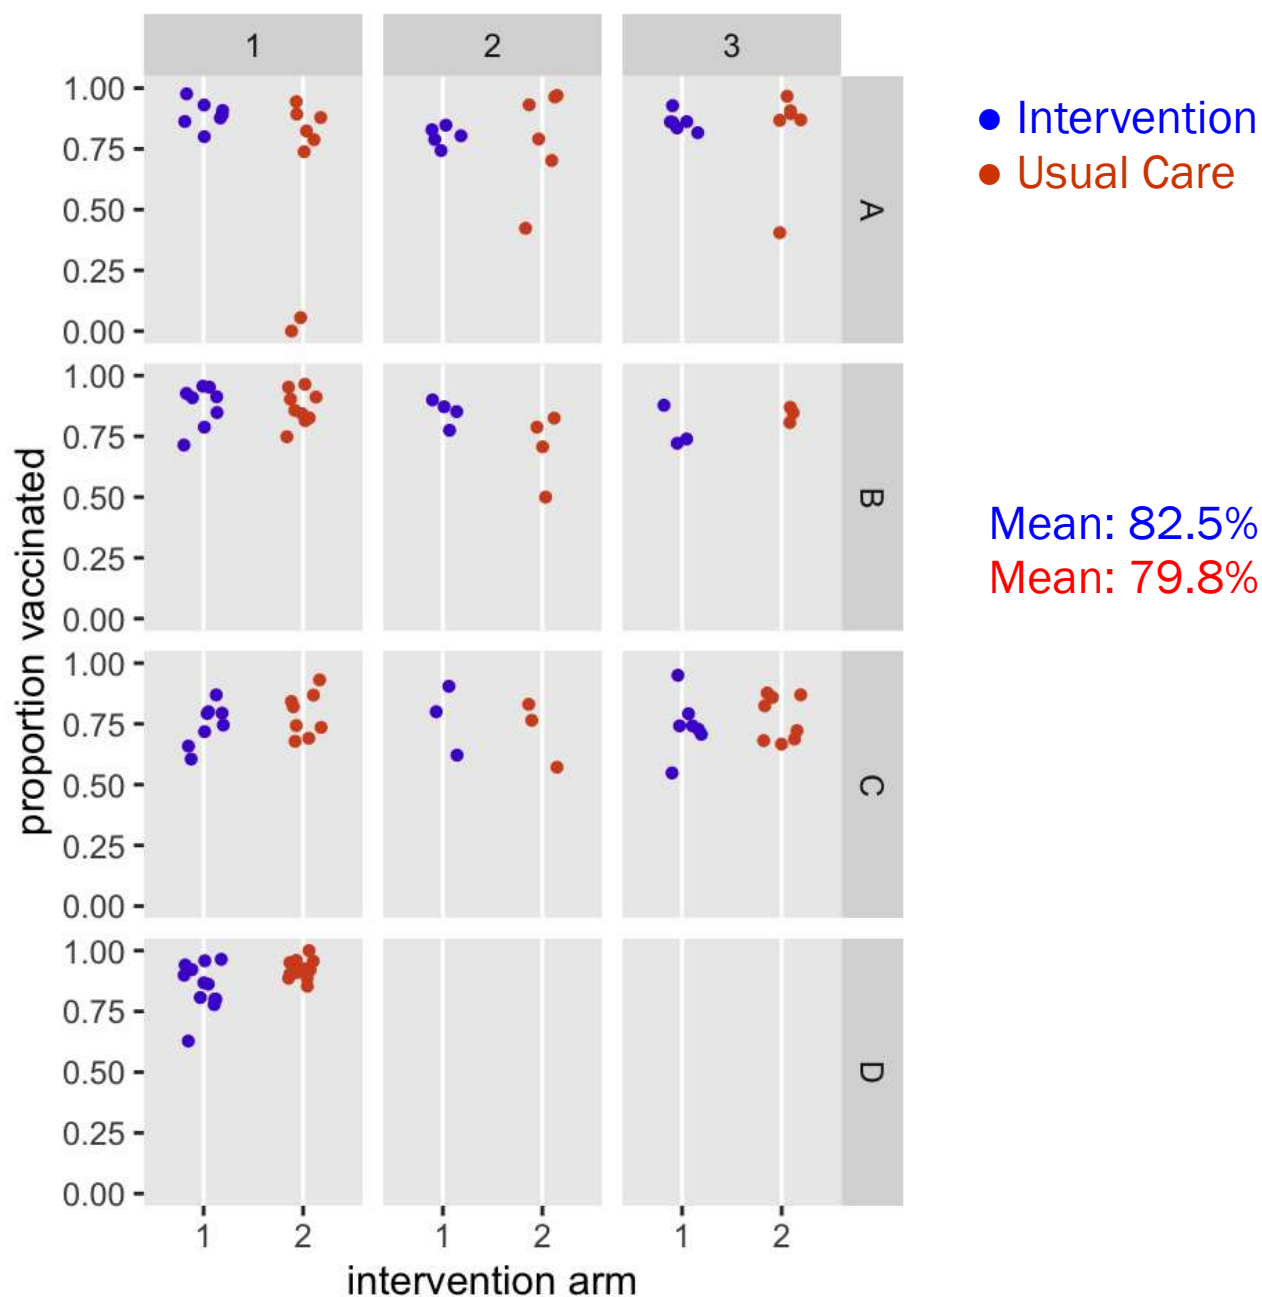

Note: Proportion of SNF residents vaccinated by arm, stratified by percent minority resident status. Columns represent strata of racial minority residents within a facility, 1 = <25% Black residents, 2 = 25-40% Black residents, 3 = >40% Black residents. Intervention arm for each strata was either 1 = Intervention (shown in blue) or 2 = Usual Care (shown in red). Rows

represent four healthcare systems enrolled in the study, A = HCS A, B = HCS B, C = HCS C, and D = HCS D.

eFigure 3: Proportion of SNF staff vaccinated by arm, stratified by percent minority resident status

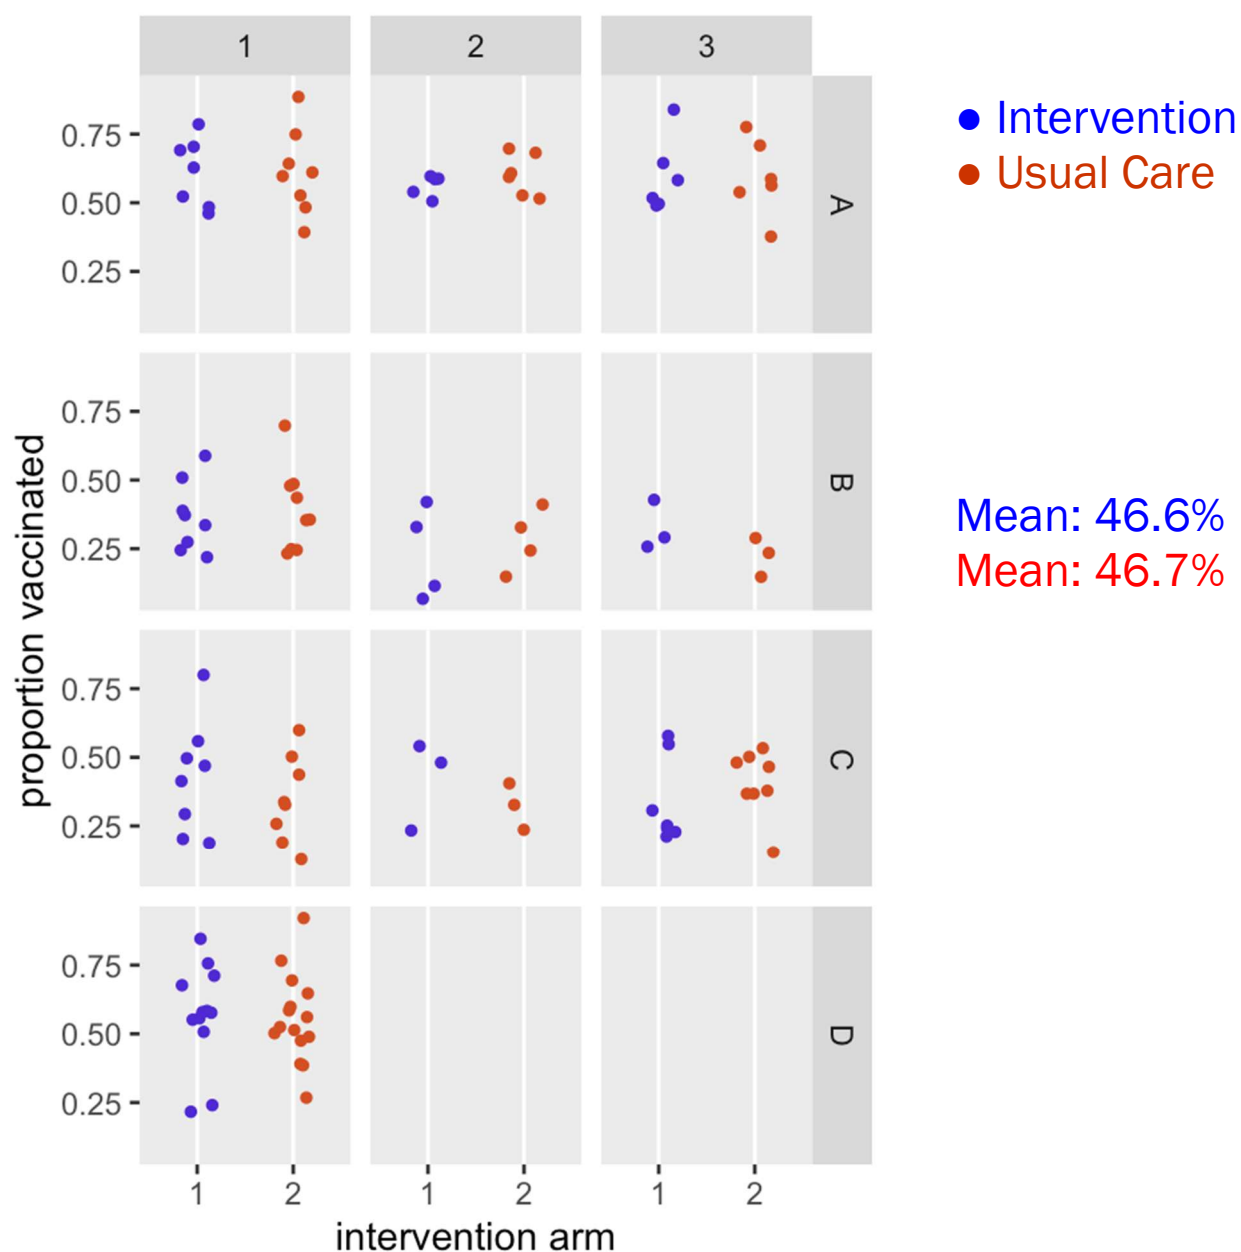

Note: Proportion of SNF staff vaccinated by arm, stratified by percent minority resident status. Columns represent strata of racial minority residents within a facility, 1 = <25% Black residents, 2 = 25-40% Black residents, 3 = >40% Black residents. Intervention arm for each strata was either 1 = Intervention (shown in blue) or 2 = Usual Care (shown in red). Rows represent four healthcare systems enrolled in the study, A = HCS A, B = HCS B, C = HCS C, and D = HCS D.

eFigure4: IMPACT-C study timeline

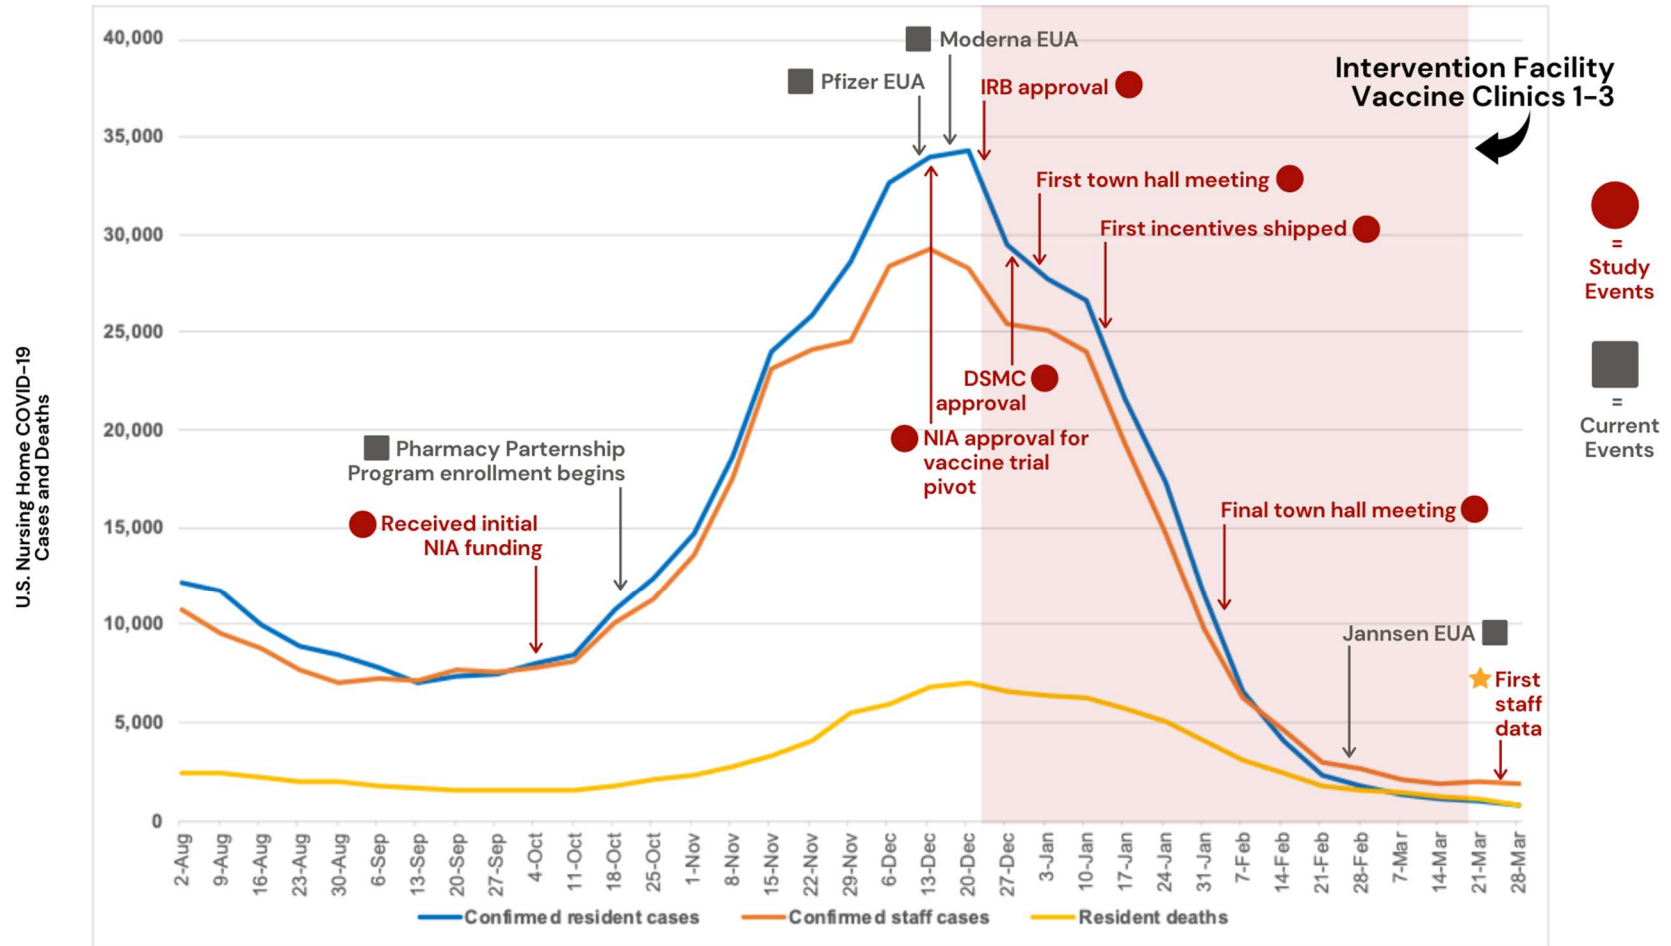

Note: The study timeline overlaid upon co-occurring COVID-19 cases and deaths among U.S. Nursing Home residents and staff. Pink shaded area represents three vaccine clinics conducted as part of the federal Pharmacy Partnership Program (PPP).
